# Supplementary material for: Elucidation of the reaction mechanism for the synthesis of ZnGeN2 through Zn2GeO4 ammonolysis
Source: Royal Society of Chemistry journal article supplement (doi:10.1039/d1sc00328c), 2021-01-01
Supplement: d1sc00328c1.pdf [file d1sc00328c1.pdf]

Supporting Information

## Elucidation of the reaction mechanism for the synthesis of ZnGeN<sub>2</sub> through Zn<sub>2</sub>GeO<sub>4</sub> ammonolysis

Zhenyu Wang,<sup>a,b</sup> Daniel Fritsch<sup>a</sup> Stefan Berendts,<sup>c</sup> Martin Lerch,<sup>c</sup> Joachim Breternitz<sup>\*a,d</sup> and Susan Schorr<sup>\*a,b</sup>

*a* Helmholtz-Zentrum Berlin für Materialien und Energie GmbH, Department Structure and Dynamics of Energy Materials, Hahn-Meitner-Platz 1, 14109 Berlin.

*b* Freie Universität Berlin, Department Geosciences, Malteserstraße 74-100, 12249 Berlin.

*c* Technische Universität Berlin, Fakultät II, Institut für Chemie, Straße des 17. Juni 135, 10623 Berlin, Germany

*d* Universität Potsdam, Mathematisch-Naturwissenschaftliche Fakultät, Karl-Liebknecht-Str. 24-25, 14476 Potsdam.

### 1) Synthesis conditions of the studied samples

Table S1: Summary of the reaction conditions for the samples studied herein

| Sample number | Precursor mass /g | Reaction temp. /°C | dwelling time /h | gas flow for cooling /l·min <sup>-1</sup> |                 | Nominal Composition                                      |
|---------------|-------------------|--------------------|------------------|-------------------------------------------|-----------------|----------------------------------------------------------|
| 1             | 6                 | 835                | 10               | 1.5                                       | N <sub>2</sub>  | Zn <sub>1.91</sub> GeO <sub>0.75</sub> N <sub>2.10</sub> |
| 2             | 6                 | 880                | 10               | 0.05                                      | NH <sub>3</sub> | Zn <sub>1.28</sub> GeO <sub>0.18</sub> N <sub>2.07</sub> |
| 3             | 3                 | 880                | 10               | 0.15                                      |                 | Zn <sub>1.13</sub> GeO <sub>0.09</sub> N <sub>2.03</sub> |
| 4             | 3                 | 880                | 10               | 0.15                                      |                 | Zn <sub>1.12</sub> GeO <sub>0.03</sub> N <sub>2.05</sub> |
| 5             | 3                 | 880                | 12               | 0.15                                      |                 | Zn <sub>1.09</sub> GeO <sub>0.03</sub> N <sub>2.04</sub> |
| 6             | 3                 | 880                | 12               | 0.15                                      |                 | Zn <sub>1.06</sub> GeO <sub>1.03</sub> N <sub>2.02</sub> |
| 7             | 3                 | 880                | 15               | 0.15                                      |                 | Zn <sub>1.06</sub> GeO <sub>1.02</sub> N <sub>2.03</sub> |

### 2) O and N contents as determined through hot gas extraction

Table S2: O and N contents as determined through hot-gas extraction and the respective sample masses.

| Sample number | Oxygen / wt.-% | Nitrogen / wt.-% | Sample Weight / mg |
|---------------|----------------|------------------|--------------------|
| 1             | 5.97           | 15.6             | 9.01               |
|               | 6.73           | 15.6             | 8.15               |
|               | 6.50           | 15.7             | 9.12               |
| 4             | 0.410          | 23.3             | 8.31               |
|               | 0.437          | 23.3             | 9.76               |
|               | 0.492          | 23.1             | 7.78               |
| 7             | 0.285          | 23.5             | 9.29               |
|               | 0.300          | 23.4             | 9.53               |
|               | 0.337          | 23.5             | 8.82               |
| 6             | 0.395          | 23.3             | 8.79               |
|               | 0.400          | 23.4             | 8.81               |

|   |       |      |       |
|---|-------|------|-------|
|   | 0.384 | 23.1 | 9.42  |
| 3 | 1.05  | 21.3 | 9.67  |
|   | 1.10  | 21.2 | 10.06 |
|   | 1.00  | 21.2 | 10.07 |
| 2 | 2.12  | 21.3 | 8.80  |
|   | 2.21  | 21.2 | 8.60  |
|   | 2.12  | 21.2 | 8.64  |
| 5 | 0.394 | 23.3 | 8.96  |
|   | 0.405 | 23.3 | 9.19  |
|   | 0.459 | 23.3 | 8.69  |

### 3) DFT calculation details

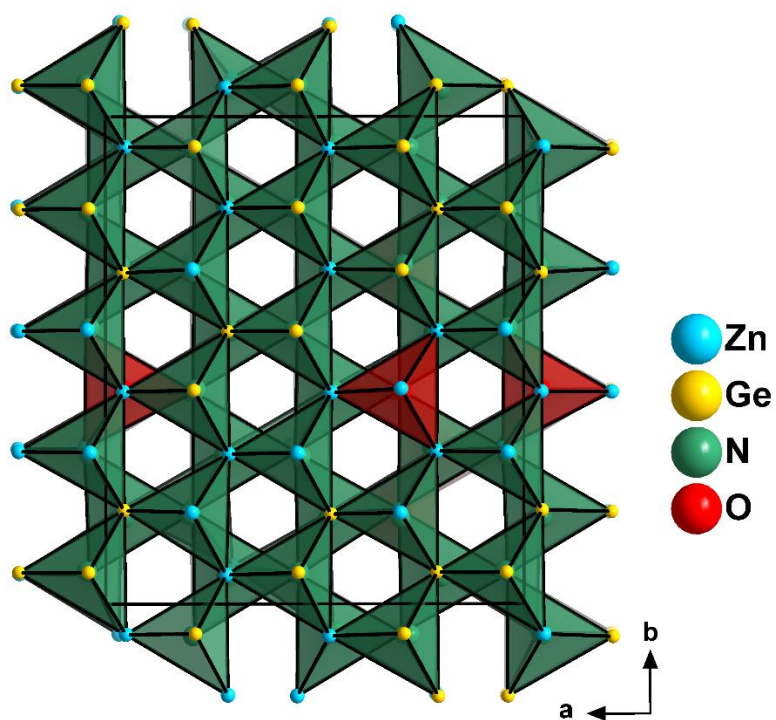

Figure S1: Representation of the DFT-optimised crystal structure of the supercell containing  $[OZn_4]$  tetrahedra along the crystallographic  $c$ -axis.

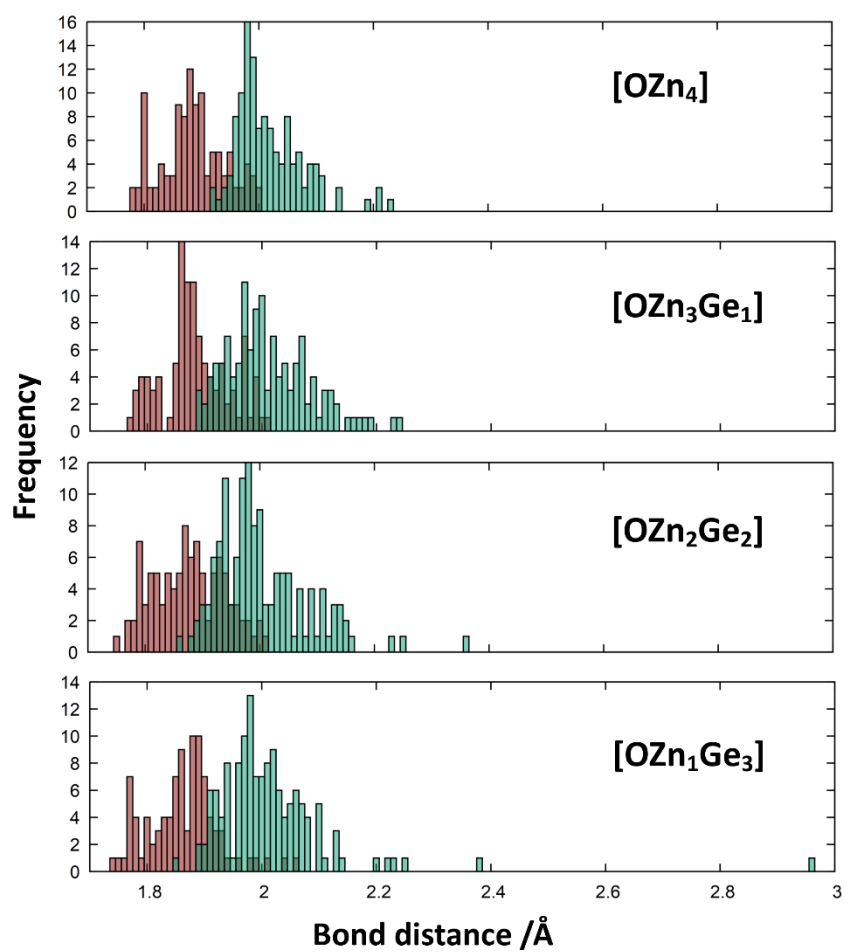

Figure S2: Histogram of the bond distance distributions in the DFT-optimised structures with Ge-N bonds in red and Zn-N distances in green.

#### 4) Results of the Rietveld refinements

##### Sample Number 1:

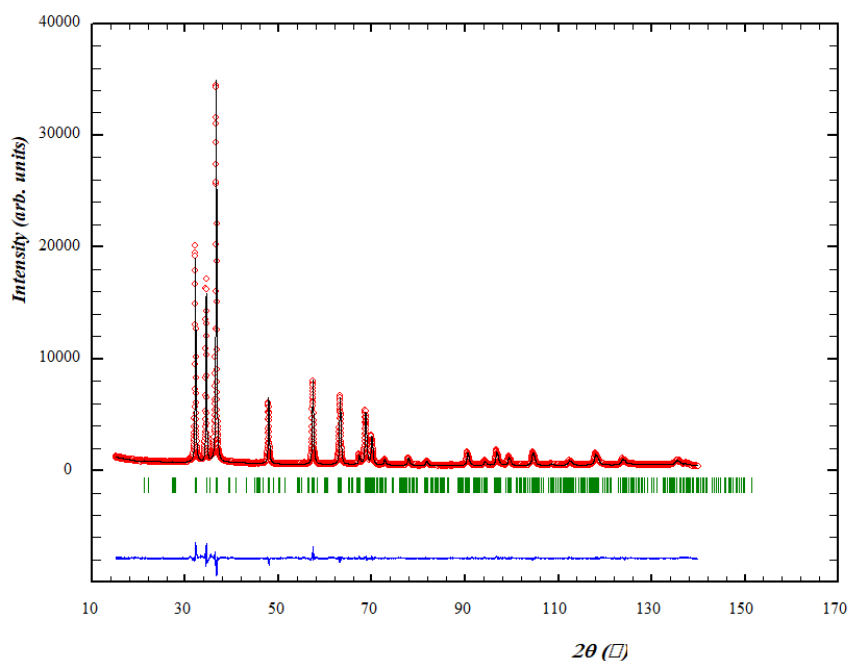

Figure S3: Plot for the Rietveld refinement of the X-ray powder diffraction profile: Measured Intensity (red circles), calculated intensity (black line), difference  $I_{\text{obs}} - I_{\text{calc}}$  (blue line) and calculated reflection positions (green ticks).

Table S3: Rietveld refinement summary

|                                                                                                                     |                                |
|---------------------------------------------------------------------------------------------------------------------|--------------------------------|
| Orthorhombic, $Pna2_1$                                                                                              | $c = 5.19767 (4) \text{ \AA}$  |
| Hall symbol: P 2c -2n                                                                                               | $V = 185.63 (1) \text{ \AA}^3$ |
| $a = 5.55805 (9) \text{ \AA}$                                                                                       | X-ray radiation                |
| $b = 6.42574 (6) \text{ \AA}$                                                                                       |                                |
| $2\theta_{\text{min}} = 15.09^\circ$ , $2\theta_{\text{max}} = 139.97^\circ$ , $2\theta_{\text{step}} = 0.02^\circ$ |                                |
| $R_p = 4.448$                                                                                                       | 6322 data points               |
| $R_{\text{wp}} = 5.716$                                                                                             | 32 parameters                  |
| $R_{\text{exp}} = 3.298$                                                                                            | 0 restraints                   |
| $R_{\text{Bragg}} = 9.939$                                                                                          |                                |

Table S4: Fractional atomic coordinates and isotropic or equivalent isotropic displacement parameters for Sample 1

|      | $x$        | $y$         | $z$         | $B_{\text{iso}}$ |
|------|------------|-------------|-------------|------------------|
| ZnGe | 0.0911 (7) | 0.1264 (15) | 0.8729 (15) | 0.68424          |
| GeZn | 0.0808 (8) | 0.6249 (14) | 0.86706     | 0.68424          |
| N1   | 0.082 (6)  | 0.124 (7)   | 0.2668 (19) | 0.68424          |
| N2   | 0.07549    | 0.61405     | 0.23897     | 0.68424          |

**Sample 2:**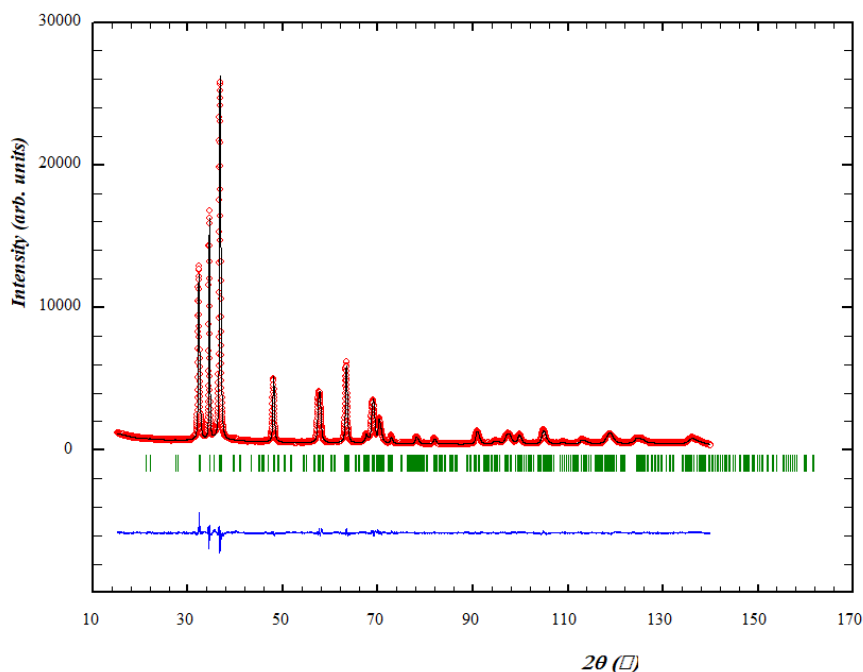

Figure S4: Plot for the Rietveld refinement of the X-ray powder diffraction profile: Measured Intensity (red circles), calculated intensity (black line), difference  $I_{obs}-I_{calc}$  (blue line) and calculated reflection positions (green ticks).

Table S5: Rietveld refinement summary

|                                                                                                |                                |
|------------------------------------------------------------------------------------------------|--------------------------------|
| Orthorhombic, $Pna2_1$                                                                         | $c = 5.19389 (5) \text{ \AA}$  |
| Hall symbol: P 2c -2n                                                                          | $V = 183.79 (1) \text{ \AA}^3$ |
| $a = 5.51540 (8) \text{ \AA}$                                                                  | X-ray radiation                |
| $b = 6.41566 (8) \text{ \AA}$                                                                  |                                |
| $2\theta_{min} = 15.12^\circ$ , $2\theta_{max} = 140.00^\circ$ , $2\theta_{step} = 0.02^\circ$ |                                |
| $R_p = 3.730$                                                                                  | 6245 data points               |
| $R_{wp} = 4.896$                                                                               | 32 parameters                  |
| $R_{exp} = 3.345$                                                                              | 0 restraints                   |
| $R_{Bragg} = 8.280$                                                                            |                                |

Table S6: Fractional atomic coordinates and isotropic or equivalent isotropic displacement parameters for Sample 2

|      | $x$        | $y$       | $z$         | $B_{iso}$ |
|------|------------|-----------|-------------|-----------|
| ZnGe | 0.0879 (4) | 0.124 (2) | 0.8711 (16) | 0.39809   |
| GeZn | 0.0756 (5) | 0.626 (2) | 0.86706     | 0.39809   |
| N1   | 0.085 (4)  | 0.130 (5) | 0.2531 (18) | 0.39809   |
| N2   | 0.07549    | 0.61405   | 0.23897     | 0.39809   |

**Sample 3:**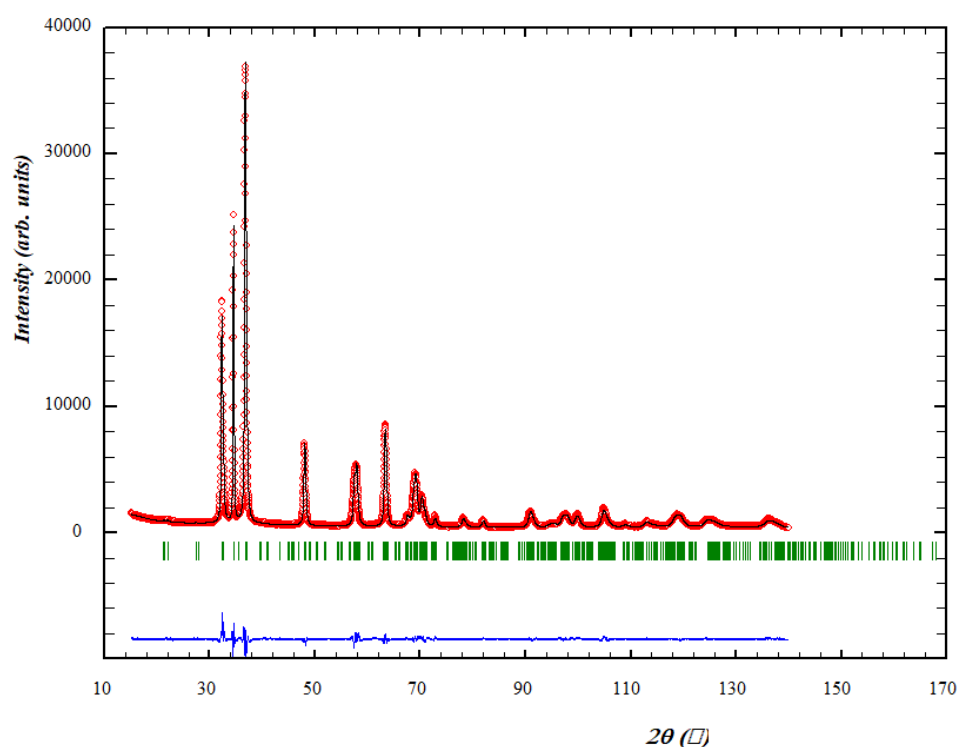

Figure S5: Plot for the Rietveld refinement of the X-ray powder diffraction profile: Measured Intensity (red circles), calculated intensity (black line), difference  $I_{\text{obs}} - I_{\text{calc}}$  (blue line) and calculated reflection positions (green ticks).

Table S7: Rietveld refinement summary

|                                                                                                                     |                                |
|---------------------------------------------------------------------------------------------------------------------|--------------------------------|
| Orthorhombic, $Pna2_1$                                                                                              | $c = 5.19289 (6) \text{ \AA}$  |
| Hall symbol: P 2c -2n                                                                                               | $V = 183.30 (1) \text{ \AA}^3$ |
| $a = 5.50173 (8) \text{ \AA}$                                                                                       | X-ray radiation                |
| $b = 6.41593 (8) \text{ \AA}$                                                                                       |                                |
| $2\theta_{\text{min}} = 15.07^\circ$ , $2\theta_{\text{max}} = 139.95^\circ$ , $2\theta_{\text{step}} = 0.02^\circ$ |                                |
| $R_p = 4.246$                                                                                                       | 6322 data points               |
| $R_{\text{wp}} = 5.481$                                                                                             | 32 parameters                  |
| $R_{\text{exp}} = 2.958$                                                                                            | 0 restraints                   |
| $R_{\text{Bragg}} = 2.787$                                                                                          |                                |

Table S8: Fractional atomic coordinates and isotropic or equivalent isotropic displacement parameters for Sample 3

|      | $x$        | $y$         | $z$         | $B_{\text{iso}}$ |
|------|------------|-------------|-------------|------------------|
| ZnGe | 0.0865 (4) | 0.1237 (15) | 0.8729 (10) | 0.33663          |
| GeZn | 0.0755 (4) | 0.6260 (15) | 0.86706     | 0.33663          |
| N1   | 0.094 (3)  | 0.134 (4)   | 0.2553 (13) | 0.33663          |
| N2   | 0.07549    | 0.61405     | 0.23897     | 0.33663          |

**Sample 4:**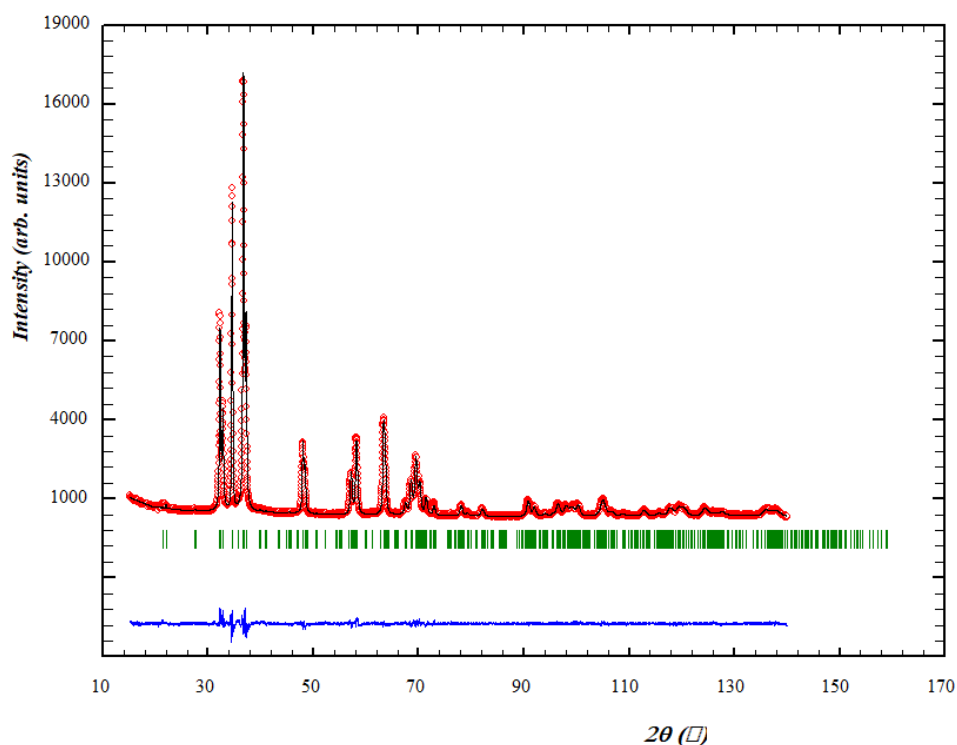

Figure S6: Plot for the Rietveld refinement of the X-ray powder diffraction profile: Measured Intensity (red circles), calculated intensity (black line), difference  $I_{\text{obs}} - I_{\text{calc}}$  (blue line) and calculated reflection positions (green ticks).

Table S9: Rietveld refinement summary

|                                                                                                                     |                                |
|---------------------------------------------------------------------------------------------------------------------|--------------------------------|
| Orthorhombic, $Pna2_1$                                                                                              | $c = 5.18922 (6) \text{ \AA}$  |
| Hall symbol: P 2c -2n                                                                                               | $V = 182.72 (1) \text{ \AA}^3$ |
| $a = 5.46291 (6) \text{ \AA}$                                                                                       | X-ray radiation                |
| $b = 6.44537 (7) \text{ \AA}$                                                                                       |                                |
| $2\theta_{\text{min}} = 15.11^\circ$ , $2\theta_{\text{max}} = 139.99^\circ$ , $2\theta_{\text{step}} = 0.02^\circ$ |                                |
| $R_p = 4.061$                                                                                                       | 6322 data points               |
| $R_{\text{wp}} = 5.178$                                                                                             | 35 parameters                  |
| $R_{\text{exp}} = 3.731$                                                                                            | 0 restraints                   |
| $R_{\text{Bragg}} = 2.696$                                                                                          |                                |

Table S10: Fractional atomic coordinates and isotropic or equivalent isotropic displacement parameters for Sample 4

|      | $x$        | $y$         | $z$         | $B_{\text{iso}}$ |
|------|------------|-------------|-------------|------------------|
| GeZn | 0.0742 (4) | 0.1279 (13) | 0.8767 (10) | 0.30676          |
| ZnGe | 0.0846 (4) | 0.6238 (14) | 0.86706     | 0.30676          |
| N1   | 0.094 (3)  | 0.109 (6)   | 0.262 (2)   | 0.30676          |
| N2   | 0.090 (3)  | 0.641 (6)   | 0.235 (3)   | 0.30676          |

**Sample 5:**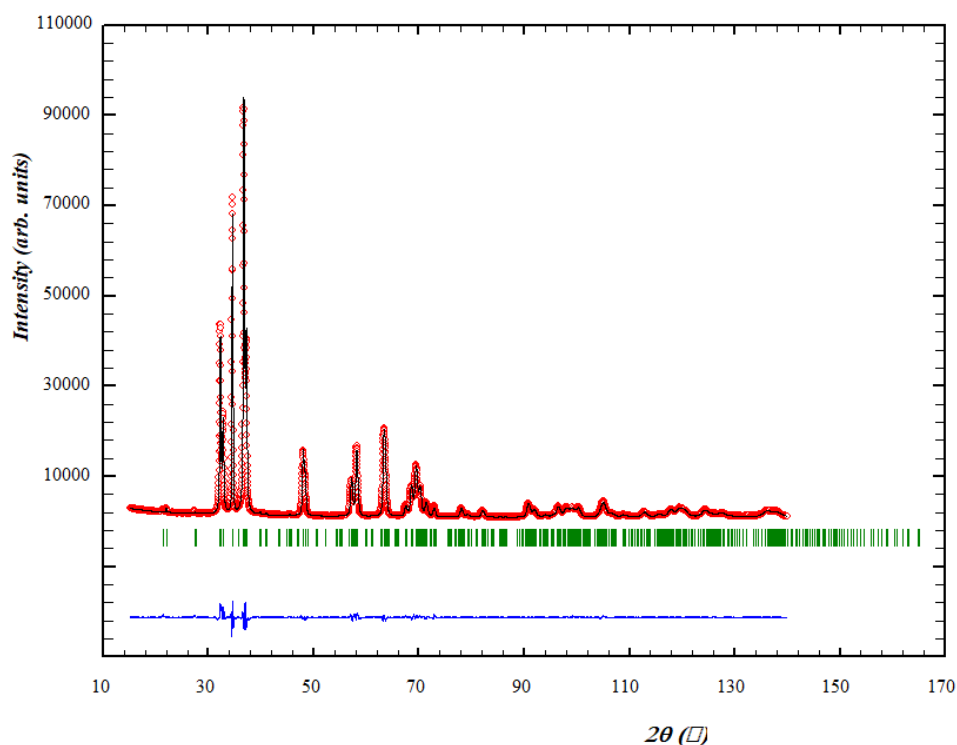

Figure S7: Plot for the Rietveld refinement of the X-ray powder diffraction profile: Measured Intensity (red circles), calculated intensity (black line), difference  $I_{\text{obs}} - I_{\text{calc}}$  (blue line) and calculated reflection positions (green ticks).

Table S11: Rietveld refinement summary

|                                                                                                                     |                                |
|---------------------------------------------------------------------------------------------------------------------|--------------------------------|
| Orthorhombic, $Pna2_1$                                                                                              | $c = 5.18941 (4) \text{ \AA}$  |
| Hall symbol: P 2c -2n                                                                                               | $V = 182.73 (1) \text{ \AA}^3$ |
| $a = 5.46480 (5) \text{ \AA}$                                                                                       | X-ray radiation                |
| $b = 6.44350 (5) \text{ \AA}$                                                                                       |                                |
| $2\theta_{\text{min}} = 15.10^\circ$ , $2\theta_{\text{max}} = 139.99^\circ$ , $2\theta_{\text{step}} = 0.02^\circ$ |                                |
| $R_p = 3.495$                                                                                                       | 6330 data points               |
| $R_{\text{wp}} = 4.547$                                                                                             | 35 parameters                  |
| $R_{\text{exp}} = 1.872$                                                                                            | 0 restraints                   |
| $R_{\text{Bragg}} = 1.926$                                                                                          |                                |

Table S12: Fractional atomic coordinates and isotropic or equivalent isotropic displacement parameters for Sample 5

|      | $x$         | $y$        | $z$         | $B_{\text{iso}}$ |
|------|-------------|------------|-------------|------------------|
| GeZn | 0.0748 (2)  | 0.1260 (4) | 0.8712 (11) | 0.33628          |
| ZnGe | 0.0849 (2)  | 0.6195 (4) | 0.86706     | 0.33628          |
| N1   | 0.0907 (16) | 0.108 (2)  | 0.2649 (10) | 0.33628          |
| N2   | 0.0864 (17) | 0.642 (2)  | 0.2243 (15) | 0.33628          |



**Sample 6:**

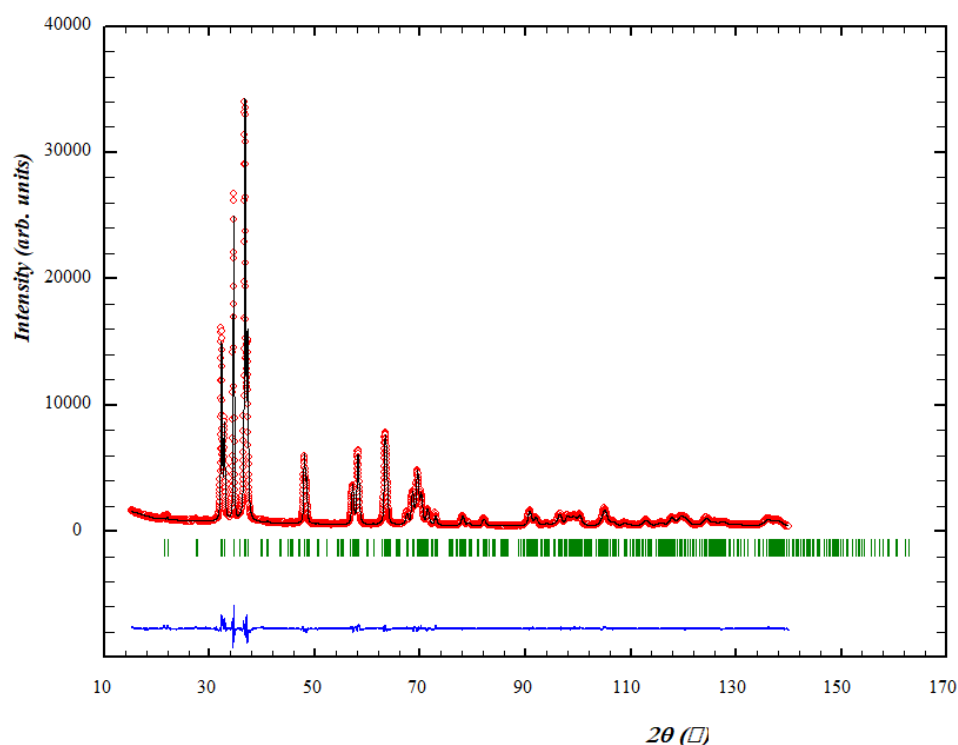

Figure S8: Plot for the Rietveld refinement of the X-ray powder diffraction profile: Measured Intensity (red circles), calculated intensity (black line), difference  $I_{\text{obs}} - I_{\text{calc}}$  (blue line) and calculated reflection positions (green ticks).

*Table S13: Rietveld refinement summary*

|                                                                                                               |                                |
|---------------------------------------------------------------------------------------------------------------|--------------------------------|
| Orthorhombic, $Pna2_1$                                                                                        | $c = 5.18926 (4) \text{ \AA}$  |
| Hall symbol: P 2c -2n                                                                                         | $V = 182.73 (1) \text{ \AA}^3$ |
| $a = 5.46315 (5) \text{ \AA}$                                                                                 | X-ray radiation                |
| $b = 6.44544 (6) \text{ \AA}$                                                                                 |                                |
| $2\theta_{\text{min}} = 15.08^\circ, 2\theta_{\text{max}} = 139.97^\circ, 2\theta_{\text{step}} = 0.02^\circ$ |                                |
| $R_p = 3.737$                                                                                                 | 6322 data points               |
| $R_{\text{wp}} = 4.819$                                                                                       | 35 parameters                  |
| $R_{\text{exp}} = 2.938$                                                                                      | 0 restraints                   |
| $R_{\text{Bragg}} = 1.877$                                                                                    |                                |

*Table S14: Fractional atomic coordinates and isotropic or equivalent isotropic displacement parameters for Sample 6*

|     | $x$         | $y$        | $z$         | $B_{\text{iso}}$ |
|-----|-------------|------------|-------------|------------------|
| Ge1 | 0.0749 (3)  | 0.1292 (5) | 0.8684 (14) | 0.31165          |
| Zn1 | 0.0845 (3)  | 0.6248 (6) | 0.86706     | 0.31165          |
| N1  | 0.0967 (18) | 0.111 (3)  | 0.2647 (14) | 0.31165          |
| N2  | 0.086 (2)   | 0.645 (2)  | 0.2260 (16) | 0.31165          |

**Sample 7:**

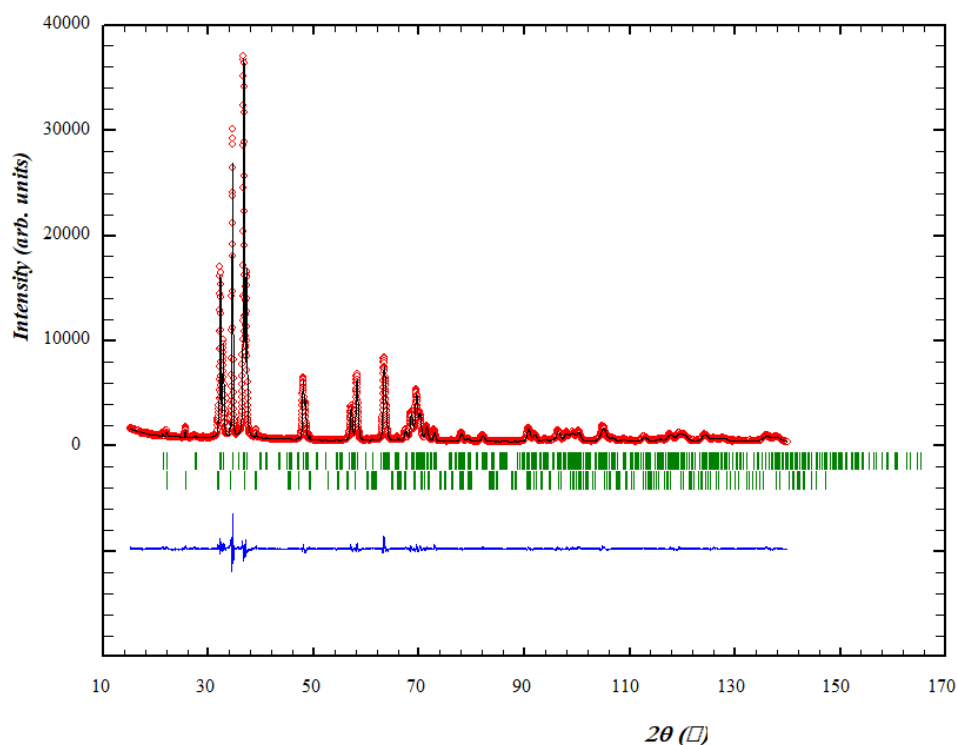

Figure S9: Plot for the Rietveld refinement of the X-ray powder diffraction profile: Measured Intensity (red circles), calculated intensity (black line), difference  $I_{\text{obs}} - I_{\text{calc}}$  (blue line) and calculated reflection positions (green ticks, Ge<sub>3</sub>N<sub>4</sub> bottom, Zn<sub>2-x</sub>GeN<sub>2</sub>O<sub>1-x</sub> top).

Table S15: Rietveld refinement summary for the Zn<sub>2-x</sub>GeN<sub>2</sub>O<sub>1-x</sub> phase of Sample 7

|                                                                                                                     |                                |
|---------------------------------------------------------------------------------------------------------------------|--------------------------------|
| Orthorhombic, $Pna2_1$                                                                                              | $c = 5.18909 (5) \text{ \AA}$  |
| Hall symbol: P 2c -2n                                                                                               | $V = 182.70 (1) \text{ \AA}^3$ |
| $a = 5.45942 (6) \text{ \AA}$                                                                                       | X-ray radiation                |
| $b = 6.44914 (7) \text{ \AA}$                                                                                       |                                |
| $2\theta_{\text{min}} = 15.09^\circ$ , $2\theta_{\text{max}} = 139.97^\circ$ , $2\theta_{\text{step}} = 0.02^\circ$ | Phase Fraction: 98.5(3) %      |
| $R_p = 4.639$                                                                                                       | 6322 data points               |
| $R_{\text{wp}} = 6.095$                                                                                             | 35 parameters                  |
| $R_{\text{exp}} = 2.936$                                                                                            | 0 restraints                   |
| $R_{\text{Bragg}} = 2.529$                                                                                          |                                |

Table S16: Fractional atomic coordinates and isotropic or equivalent isotropic displacement parameters for the Zn<sub>2-x</sub>GeN<sub>2</sub>O<sub>1-x</sub> phase of Sample 7

|      | $x$        | $y$        | $z$        | $B_{\text{iso}}$ |
|------|------------|------------|------------|------------------|
| GeZn | 0.0855 (3) | 0.1210 (7) | 0.8605 (9) | 0.17790          |
| ZnGe | 0.0721 (3) | 0.6263 (9) | 0.86706    | 0.17790          |
| N1   | 0.098 (2)  | 0.104 (3)  | 0.256 (3)  | 0.17790          |
| N2   | 0.082 (2)  | 0.640 (4)  | 0.233 (2)  | 0.17790          |

*Table S17: Rietveld refinement summary for the Ge<sub>3</sub>N<sub>4</sub> phase of Sample 7*

|                                                                                                         |                                |
|---------------------------------------------------------------------------------------------------------|--------------------------------|
| DUMMY, $P6_3/m$                                                                                         | $\alpha = 90^\circ$            |
| Hall symbol: -P 6c                                                                                      | $\beta = 90^\circ$             |
| $a = 8.0309 (3) \text{ \AA}$                                                                            | $\gamma = 120^\circ$           |
| $b = 8.0309 (3) \text{ \AA}$                                                                            | $V = 171.92 (1) \text{ \AA}^3$ |
| $c = 3.07807 (16) \text{ \AA}$                                                                          | X-ray radiation                |
| $2\theta_{\min} = 15.09^\circ$ , $2\theta_{\max} = 139.97^\circ$ , $2\theta_{\text{step}} = 0.02^\circ$ | Phase Fraction: 1.52(1) %      |
| $R_p = 4.639$                                                                                           | 0 data points                  |
| $R_{wp} = 6.095$                                                                                        | 35 parameters                  |
| $R_{\text{exp}} = 2.936$                                                                                | 0 restraints                   |
| $R_{\text{Bragg}} = 17.298$                                                                             |                                |

*Table S18: Fractional atomic coordinates and isotropic or equivalent isotropic displacement parameters for the Ge<sub>3</sub>N<sub>4</sub> phase of Sample 7*

|     | $x$     | $y$     | $z$     | $B_{\text{iso}}$ |
|-----|---------|---------|---------|------------------|
| Ge1 | 0.17120 | -0.2342 | 0.25000 | -0.01688         |
| N1  | 0.33350 | 0.02950 | 0.25000 | -0.01688         |
| N2  | 0.33330 | 0.66670 | 0.25000 | -0.01688         |

### 5) Dwelling time and reaction temperature relation samples

Only samples made under otherwise identical reaction conditions (250 K/h heating under 1.5 l/min N<sub>2</sub>, dwelling and cooling under 0.15 l/min NH<sub>3</sub>) were used to deploy the model. Ceramic foam was used to mantle holes where the reaction tube came in and out of the furnace in order to maximise the temperature stability during the reaction.

Scheme S1: The samples employed to develop the relationship between reaction temperature, dwelling time and orthorhombic distortion.

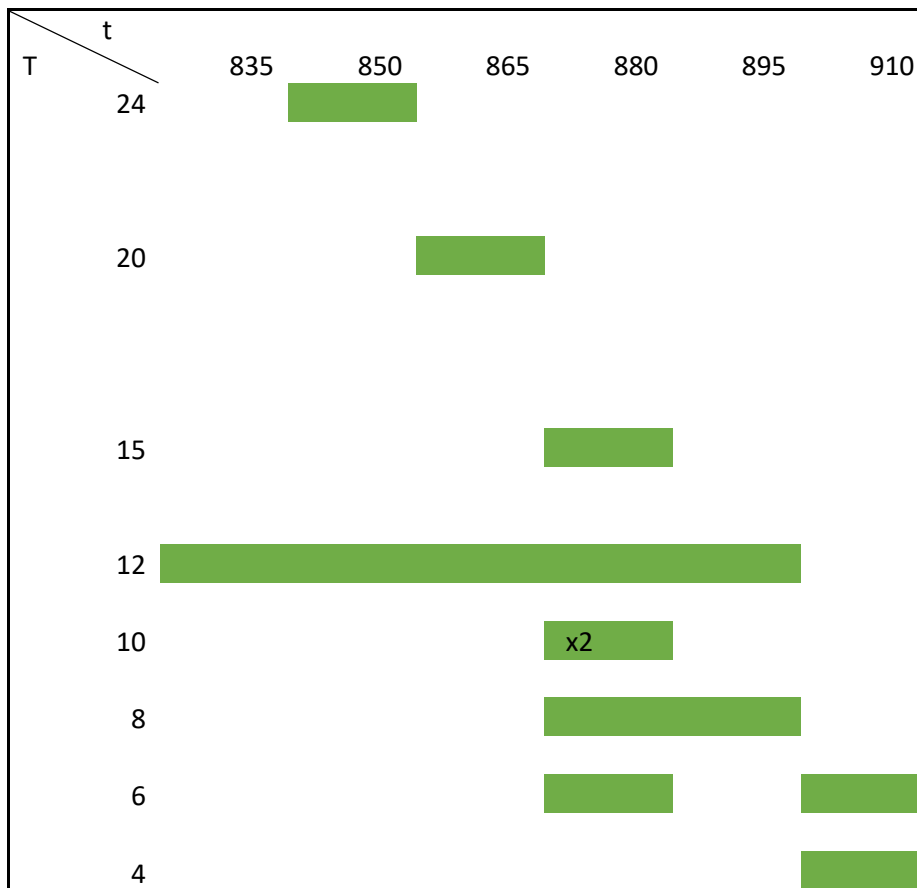

Mathematically, the model expresses as discontinuous function with:

for  $\Delta a/a_1 \leq 1$ :

$$\Delta a/a_1 = 0.353(0.235) \times \exp\{0.135(0.052) \times g(T) \times t\} - 0.353(0.235)$$

with

$$\ln[g(T)] = 33.929(1.5239) - 39106(1726) \frac{1}{T}$$

for  $\Delta a/a_1 > 1$ :

$$a/a_1 = 2.223(0.044)$$

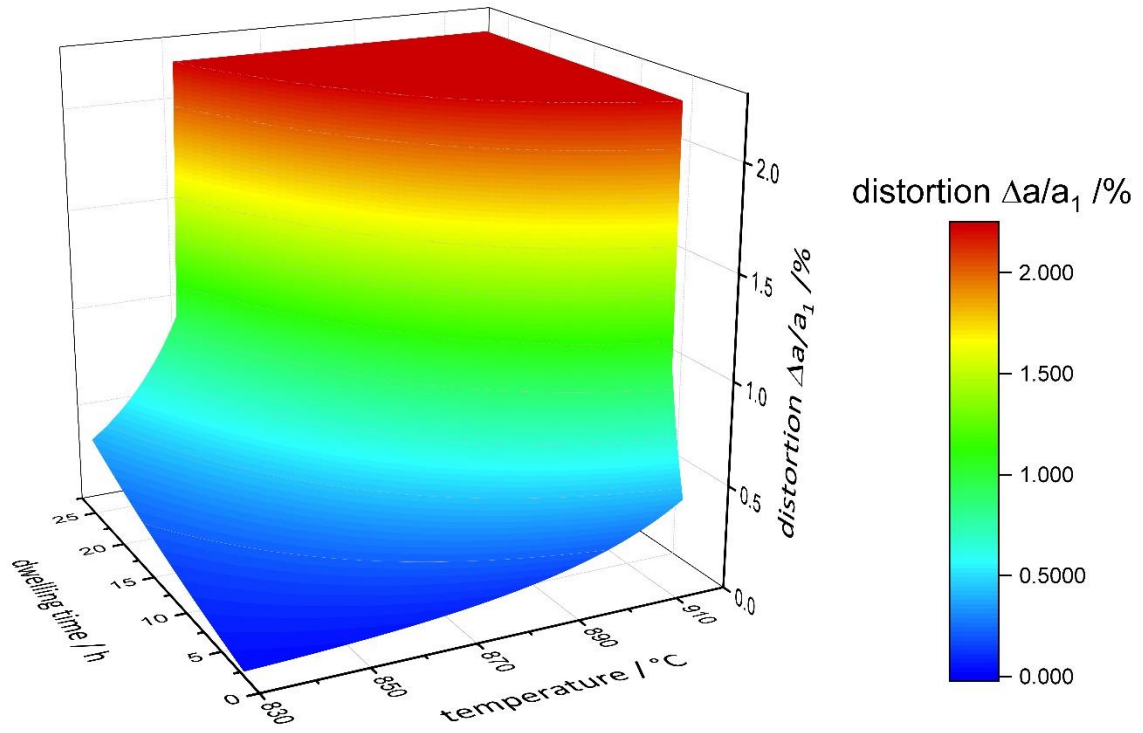

Figure S10: 3D surface plot of the orthorhombic distortion as a function of dwelling time and reaction temperature.
